# Supplementary material for: Acid etching induced defective Co3O4 as an efficient catalyst for methane combustion reaction
Source: Royal Society of Chemistry journal article supplement (doi:10.1039/d0nj06110g), 2021-01-01
Supplement: d0nj06110g1.pdf [file d0nj06110g1.pdf]

## Electronic Supplementary Information

### Acid etching induced defective $\text{Co}_3\text{O}_4$ as an efficient catalyst for methane combustion reaction

Liurui Bao<sup>a, 1</sup>, Le Chang<sup>a, 1</sup>, Lisha Yao<sup>b</sup>, Wenhao Meng<sup>a</sup>, Qiang Yu<sup>a</sup>, Xin Zhang<sup>a</sup>,  
Xuehua Liu<sup>a</sup>, Xianfen Wang<sup>a</sup>, Wei Chen<sup>c</sup>, Xingyun Li<sup>a, b, \*</sup>

<sup>a</sup>Institute of Materials for Energy and Environment, College of Materials Science and Engineering, Qingdao University, Qingdao, 266071, China

<sup>b</sup>Key Laboratory of Advanced Energy Materials Chemistry (Ministry of Education), College of Chemistry, Nankai University, Tianjin 300071, China

<sup>c</sup>Key Laboratory of Low-Carbon Conversion Science & Engineering, Shanghai Advanced Research Institute, Chinese Academy of Sciences, China

---

<sup>1</sup> These authors contributed equally to this work.

\* Corresponding Authors:

E-mail: xingyun\_2008@sina.cn (X. Li)

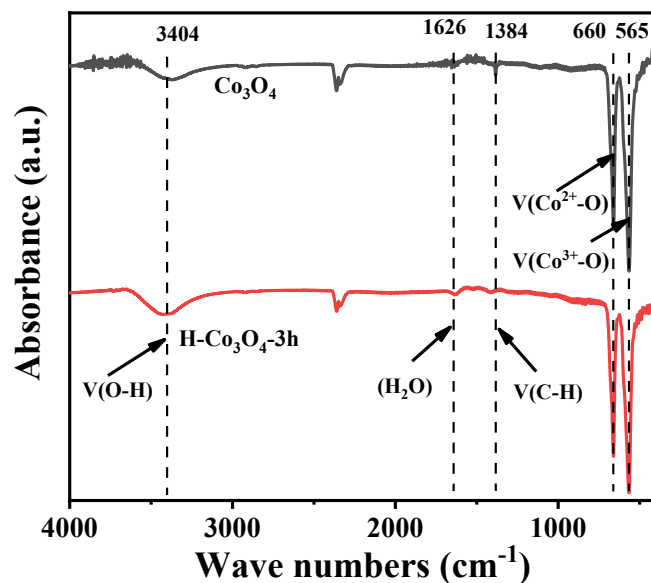

Fig. S1. FTIR images of the pristine Co<sub>3</sub>O<sub>4</sub> and H-Co<sub>3</sub>O<sub>4</sub>-3h

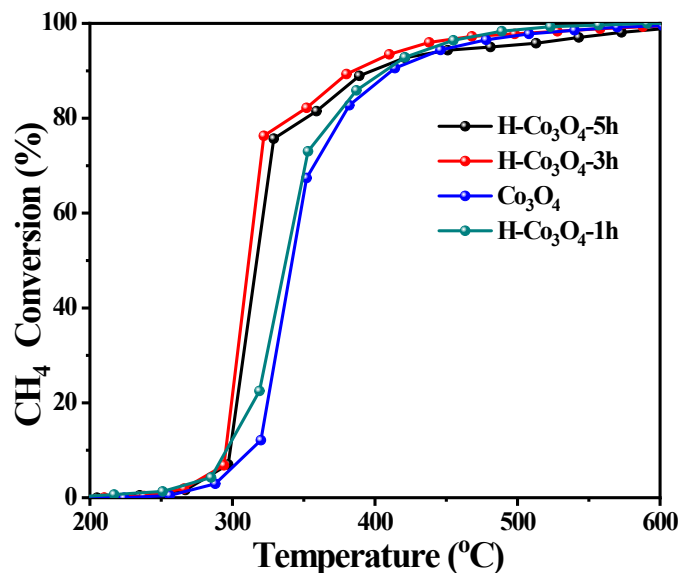

Fig.S2. Light-off curves for CH<sub>4</sub> oxidation over Co<sub>3</sub>O<sub>4</sub> etched at different time (gas mixer: 2% CH<sub>4</sub>, 20% O<sub>2</sub>, Ar as balance gas, WHSV= 33,000 mL g<sup>-1</sup> h<sup>-1</sup>).

Table S1. Mass change for H-Co<sub>3</sub>O<sub>4</sub> at different etching time.

| Sample                               | Initial mass (mg) | Mass after etching (mg) | Mass loss |
|--------------------------------------|-------------------|-------------------------|-----------|
| H-Co <sub>3</sub> O <sub>4</sub> -1h | 200               | 184                     | 8%        |
| H-Co <sub>3</sub> O <sub>4</sub> -3h | 200               | 168                     | 16%       |
| H-Co <sub>3</sub> O <sub>4</sub> -5h | 200               | 162                     | 19%       |
